# Supplementary material for: Cytoneme-mediated intercellular signaling in keratinocytes is essential for epidermal remodeling in zebrafish
Source: eLife journal article supplement (doi:10.7554/elife.97400), 2024-05-16
Supplement: fig4-figsupp1-data1 [file Figure 4_Figure supplement1_Source data 1.pdf › Figure 4_Figure supplement1_Source data 1/Figure 4_Figure supplement1_Source data 1.pdf]

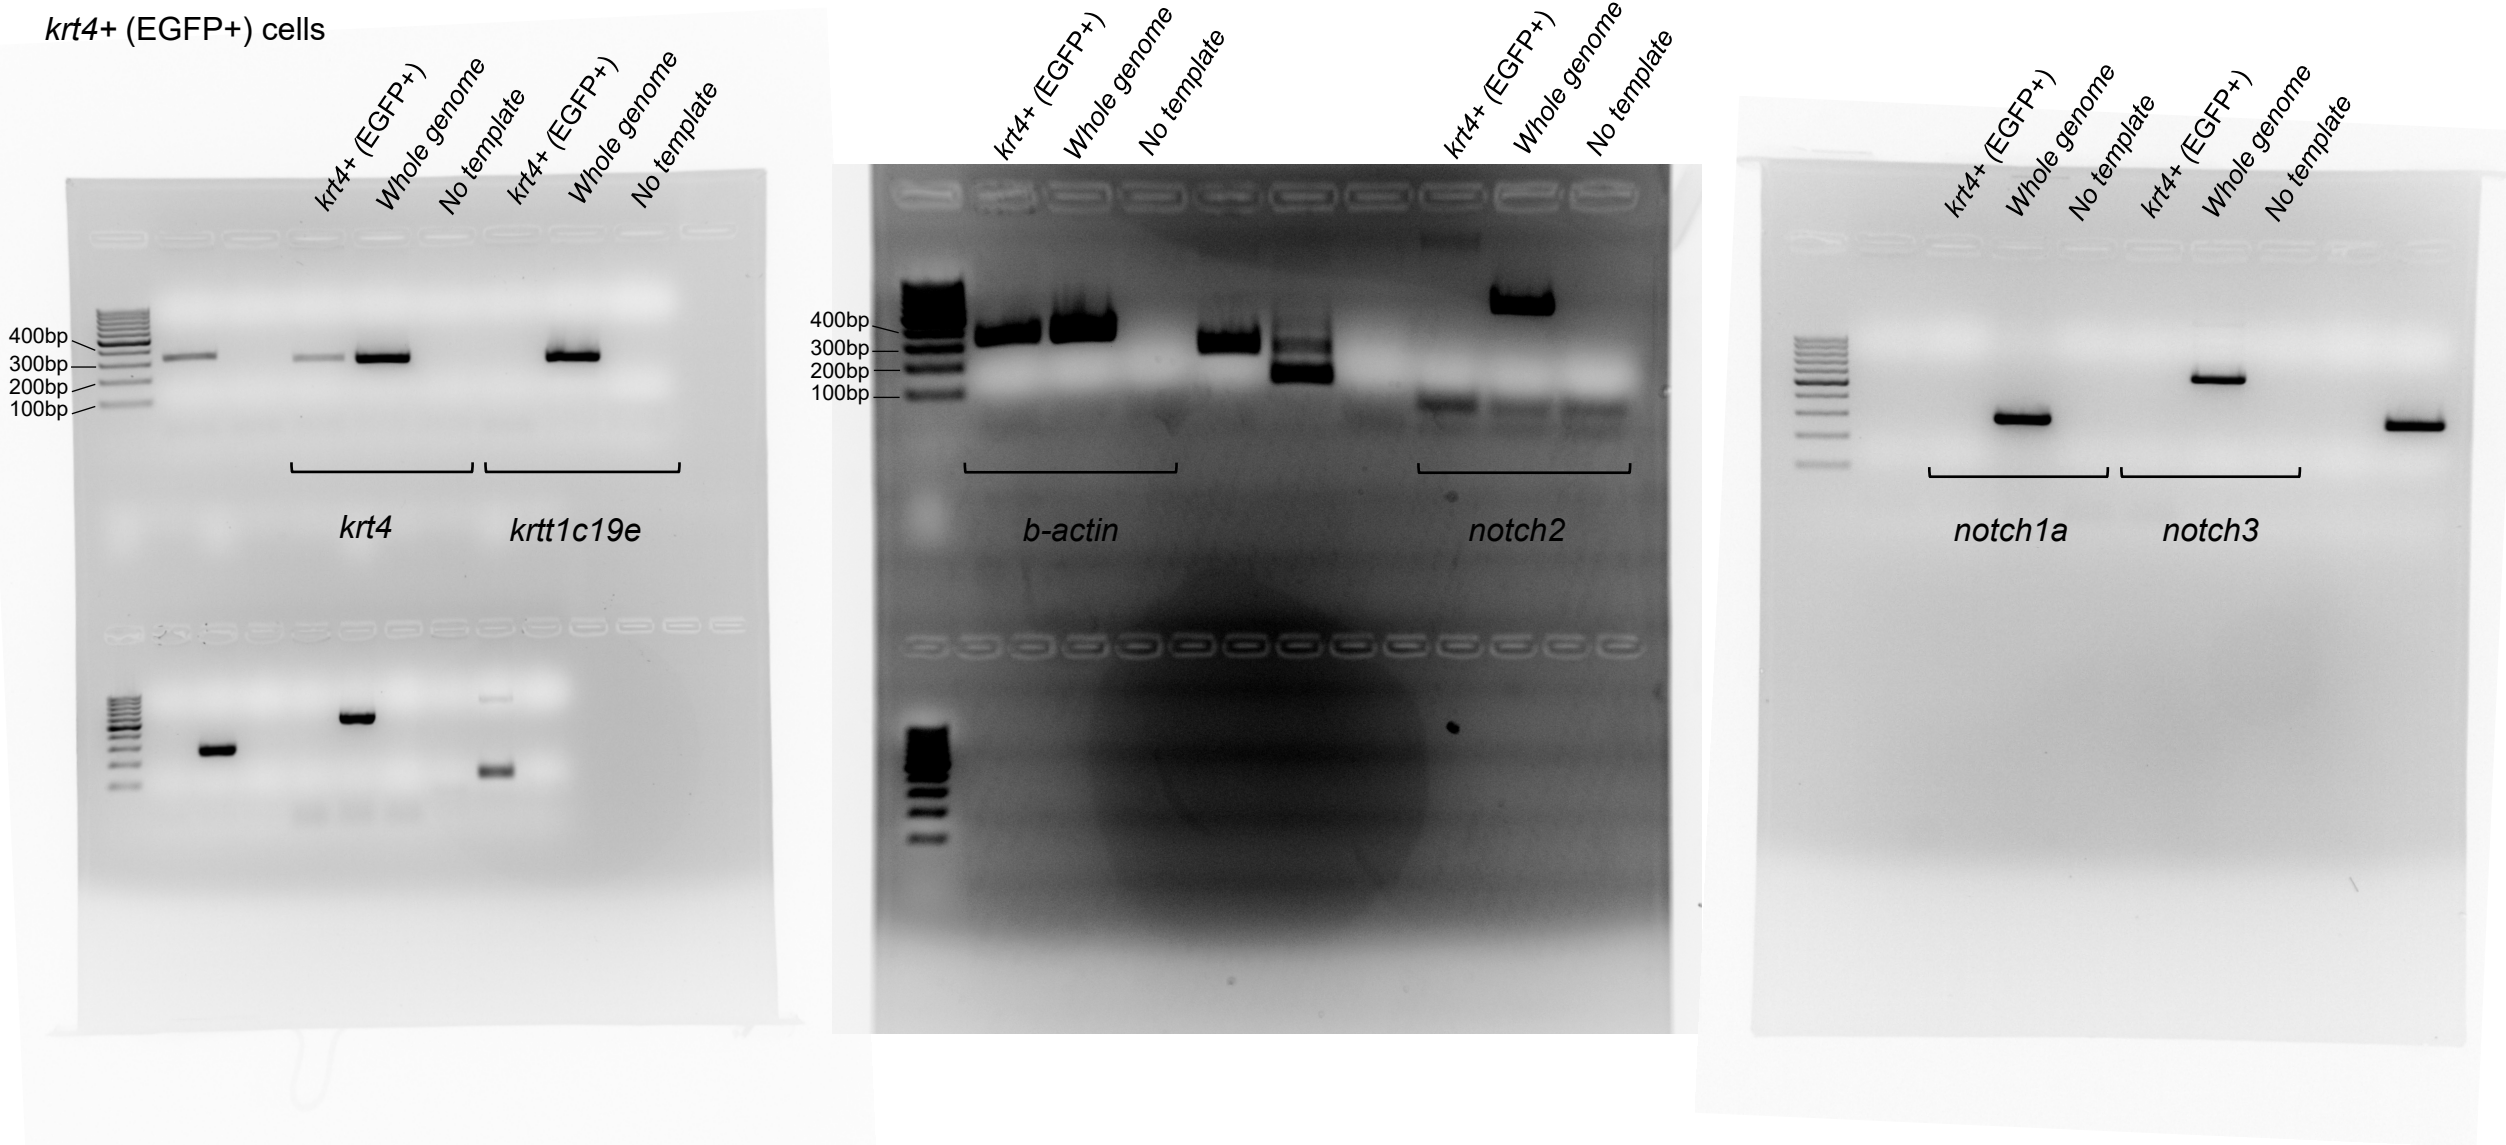

**Figure 4, Figure supplement 1, Source Data 1.1** Original gels corresponding to Figure supplement 1 (Left panel). All samples were amplified using corresponding primers to detect the endogenous expression of *krt4*, *krtt1c19e*, *b-actin*, *notch 2*, *notch 1a* and *notch 3* in EGFP+ FACS-sorted cells from *Tg(krt4:lyn-EGFP)*. Samples were loaded on the gels in the following order: target, positive control (whole genome) and negative control (no template). 100bp DNA ladder was used for all gels and all molecular weight markers were employed.

*krt4+* (EGFP+) cells

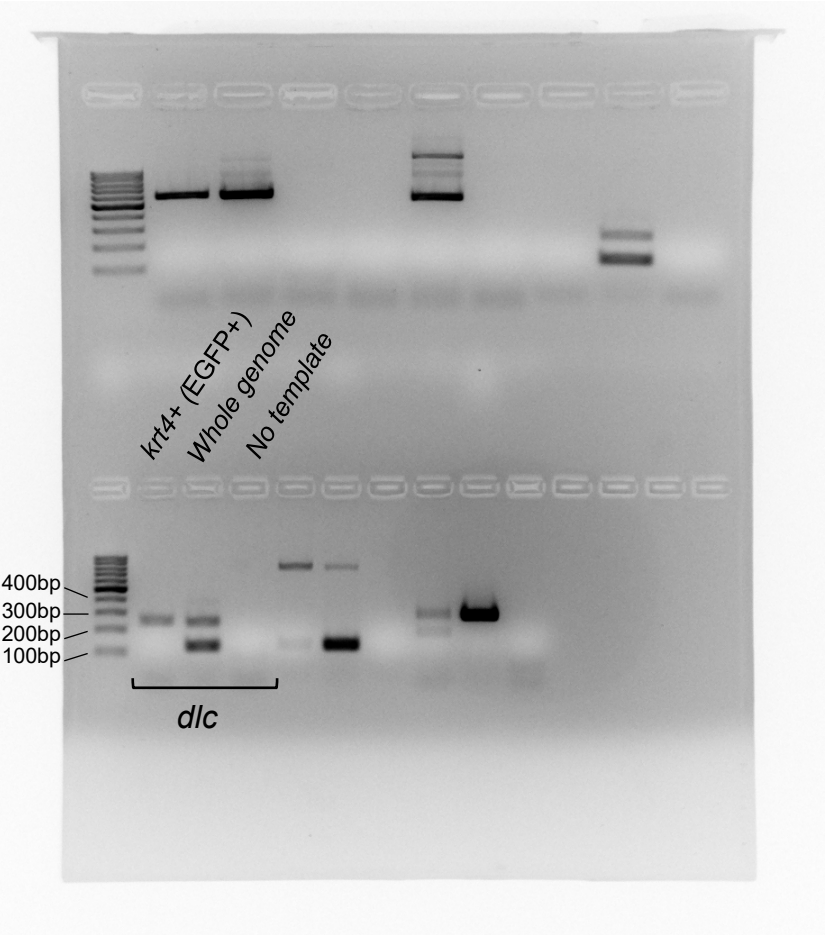

**Figure 4, Figure supplement 1, Source Data 1.2** Original gels corresponding to Figure supplement 1 (Left panel). Samples were amplified using corresponding primers to detect the endogenous expression of *dlc* in EGFP+ FACS-sorted cells from *Tg(krt4:lyn-EGFP)*. Samples were loaded on the gel in the following order: target, positive control (whole genome) and negative control (no template). 100bp DNA ladder was used for all gels and all molecular weight markers were employed.

*krtt1c19e+* (tdTomato+) cells

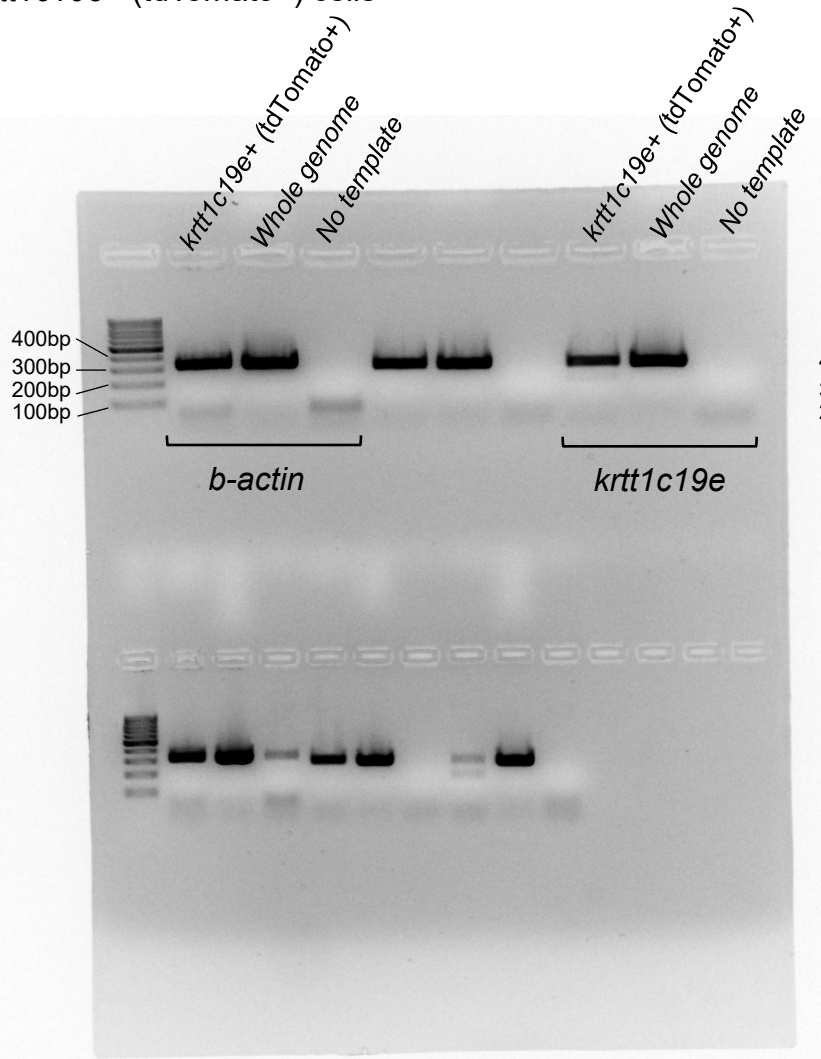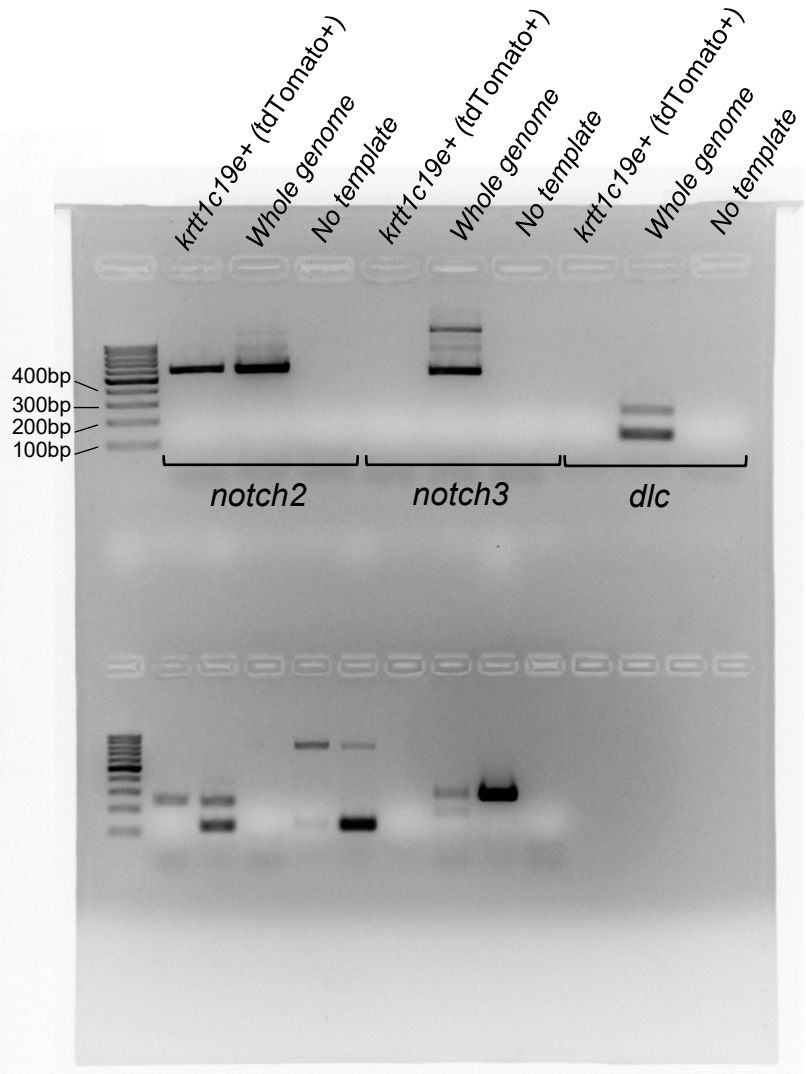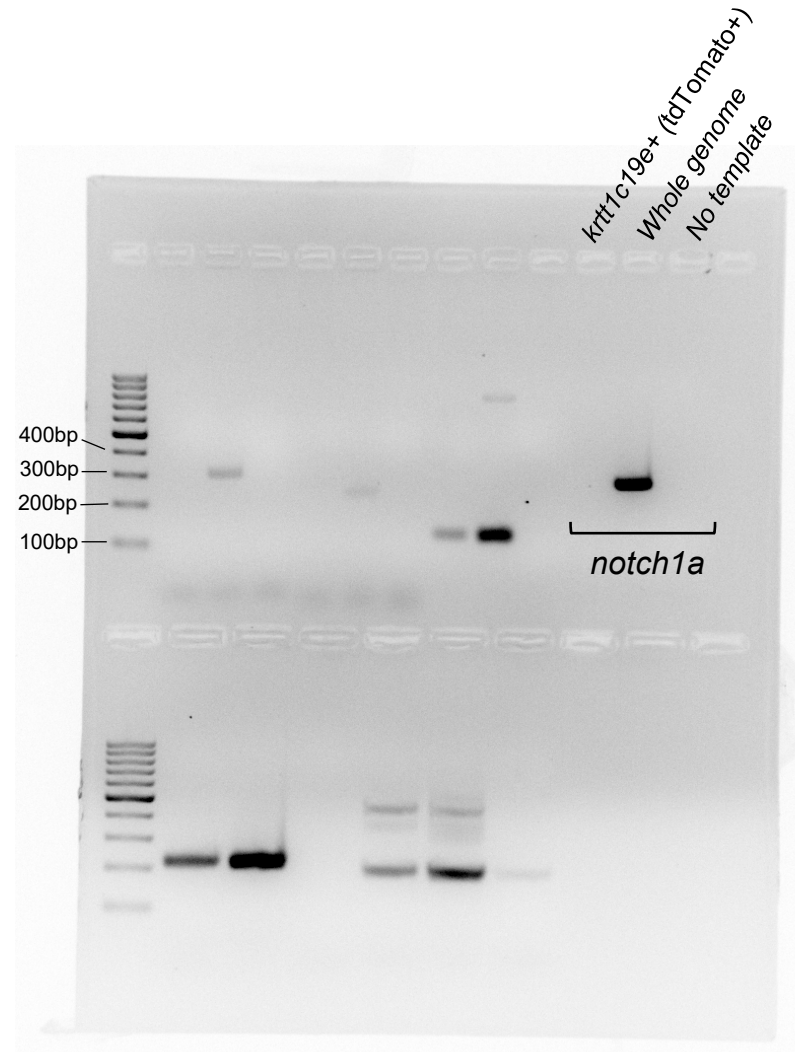

**Figure 4, Figure supplement 1, Source Data 1.3** Original gels corresponding to Figure supplement 1 (Right panel). All samples were amplified using corresponding primers to detect the endogenous expression of *b-actin*, *krtt1c19e*, *notch 2*, *notch 3*, *dlc* and *notch1a* in tdTomato+ FACS-sorted cells from *Tg(krtt1c19e:tdTomato)*. Samples were loaded on the gels in the following order: target, positive control (whole genome) and negative control (no template). 100bp DNA ladder was used for all gels and all molecular weight markers were employed.

*krtt1c19e+* (tdTomato+) cells

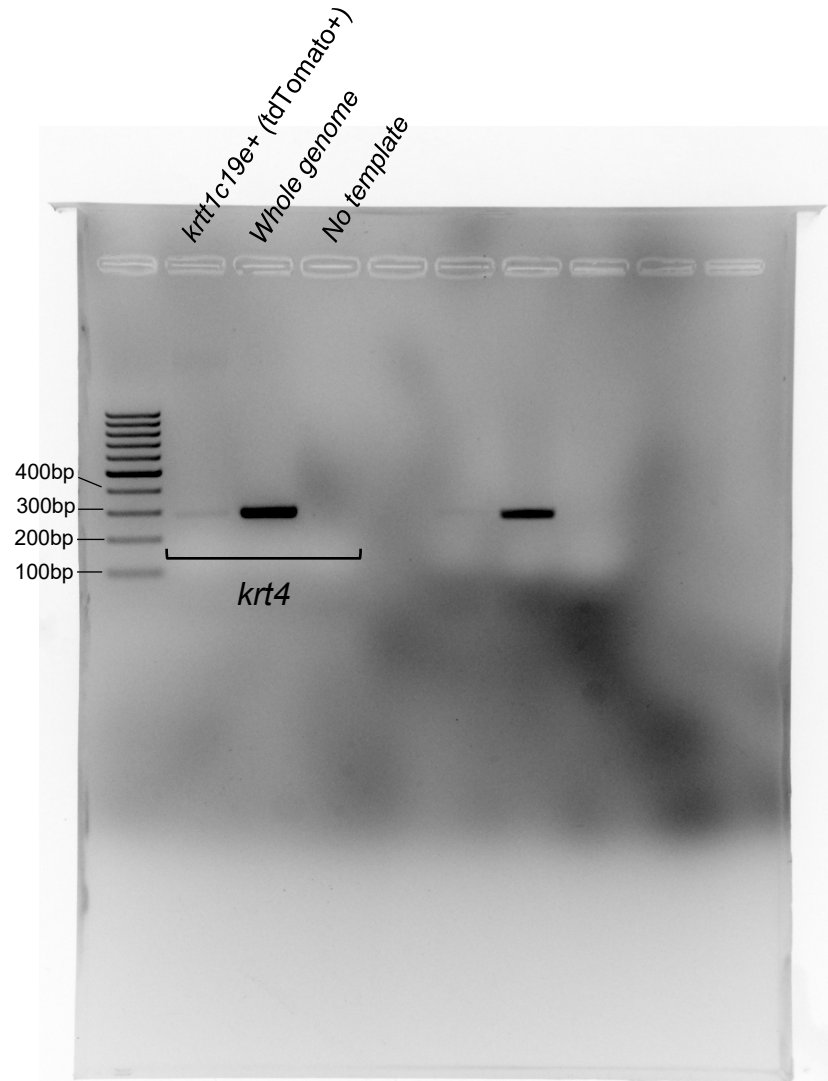

**Figure 4, Figure supplement 1, Source Data 1.4** Original gels corresponding to Figure supplement 1 (Right panel). All samples were amplified using corresponding primers to detect the endogenous expression of *krt4* in tdTomato+ FACS-sorted cells from *Tg(krtt1c19e:tdTomato)*. Samples were loaded on the gel in the following order: target, positive control (whole genome) and negative control (no template). 100bp DNA ladder was used for all gels and all molecular weight markers were employed.
