# Supplementary material for: Cytoneme-mediated intercellular signaling in keratinocytes is essential for epidermal remodeling in zebrafish
Source: eLife journal article supplement (doi:10.7554/elife.97400), 2024-05-16
Supplement: fig6-figsupp1-data1 [file Figure 6_Figure supplement1_Source data 1.pdf › Figure 6_Figure supplement1_Source data 1/Figure 6_Figure supplement1_Source data 1.pdf]

Ladder

b-Actin

IL-17

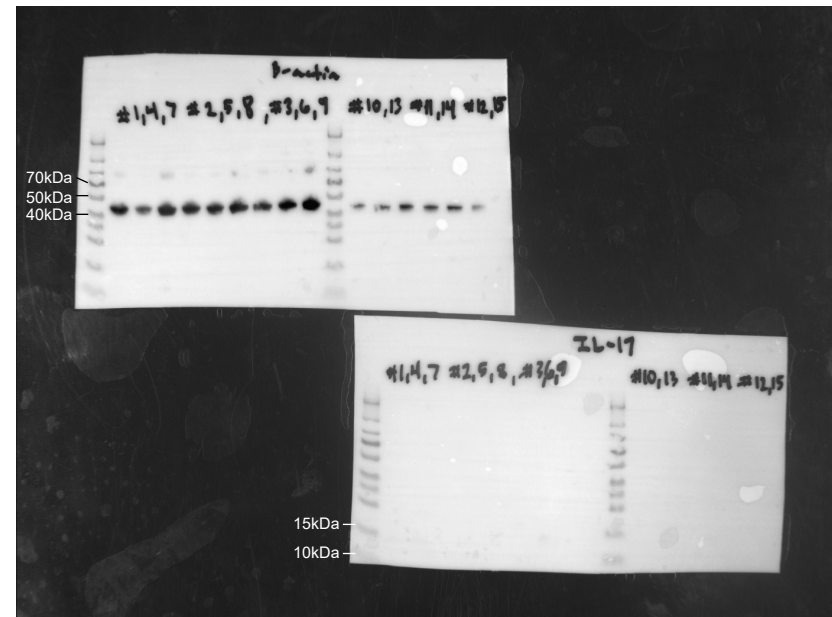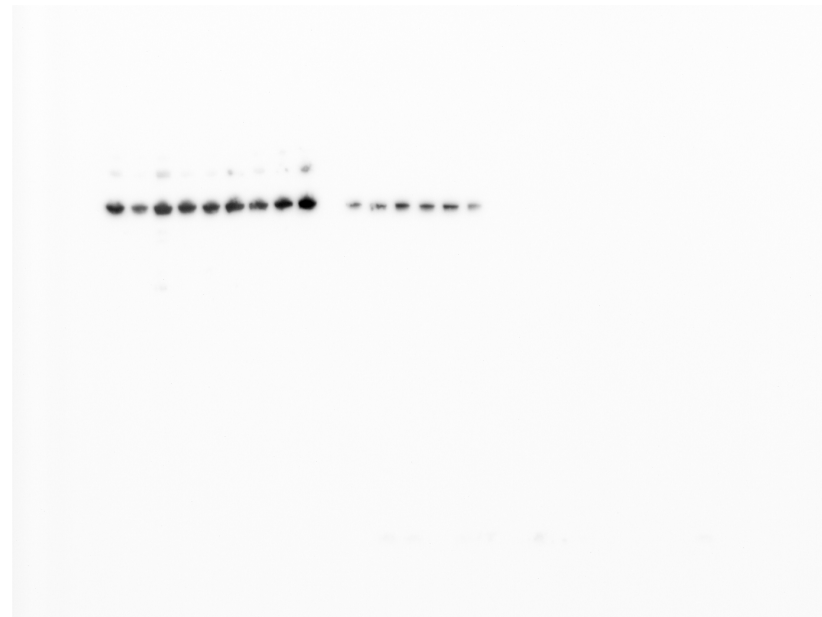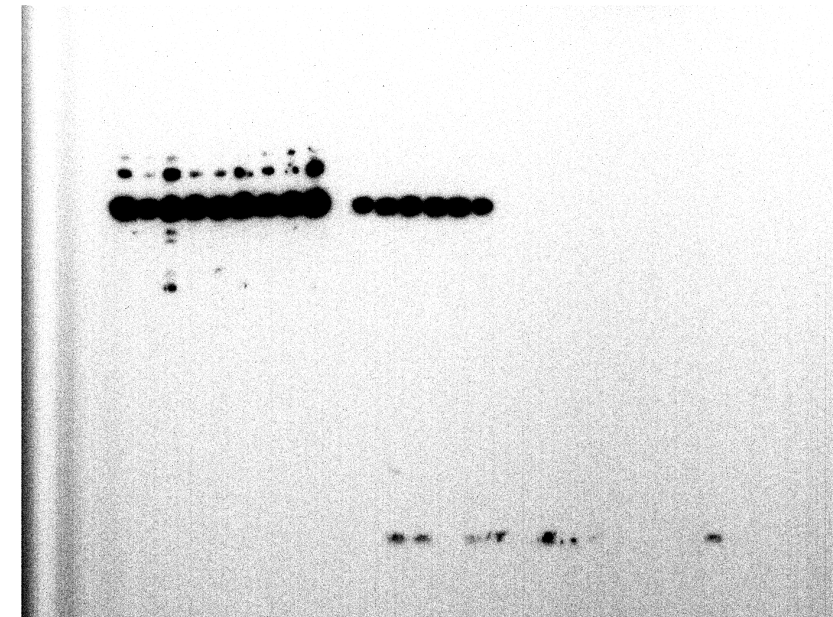

b-Actin

IL-17

**Figure 6, Figure supplement 1, Source Data 1.** Original membranes corresponding to Figure supplement 1. First three lanes correspond to wild-type, heterozygous *il17a* CRISPR mutant and homozygous *il17a* CRISPR mutant. All molecular weight markers were employed.
